# Supplementary material
Source: PubMed Central journal article supplement (PMC7989806)
Supplement: NIHMS1037127-supplement-Supplemental_Material.pdf [file NIHMS1037127-supplement-Supplemental_Material.pdf]

ETV ACROSS CONTEXTS AND TRAUMA SYMPTOMS

Table S1.

*Descriptive Statistics of PTSS Variables for the Total Sample and across Latent Profiles*

|                |                 | Total Sample<br>( <i>N</i> = 239) | Low<br>( <i>N</i> = 130) | Moderate<br>( <i>N</i> = 87) | High<br>( <i>N</i> = 22) |
|----------------|-----------------|-----------------------------------|--------------------------|------------------------------|--------------------------|
| Dissociation   | <i>M</i>        | 0.32                              | 0.15*                    | 0.51*                        | 0.46*                    |
|                | <i>SD</i>       | 0.48                              | 0.30                     | 0.69                         | 0.58                     |
|                | <i>Skew</i>     | 2.52                              | 3.43                     | 1.86                         | 1.01                     |
|                | <i>Kurtosis</i> | 7.59                              | 14.22                    | 3.13                         | 0.23                     |
| Numbing        | <i>M</i>        | 0.31                              | 0.35*                    | 0.15*                        | 0.64*                    |
|                | <i>SD</i>       | 0.42                              | 0.57                     | 0.32                         | 0.66                     |
|                | <i>Skew</i>     | 2.32                              | 2.54                     | 2.12                         | 1.51                     |
|                | <i>Kurtosis</i> | 6.57                              | 8.14                     | 4.67                         | 2.09                     |
| Avoidance      | <i>M</i>        | 0.55                              | 0.56                     | 0.43                         | 1.01                     |
|                | <i>SD</i>       | 0.70                              | 0.99                     | 1.05                         | 1.02                     |
|                | <i>Skew</i>     | 1.61                              | 1.82                     | 1.43                         | 1.05                     |
|                | <i>Kurtosis</i> | 1.96                              | 2.53                     | 1.81                         | 0.25                     |
| Hypervigilance | <i>M</i>        | 0.38                              | 0.42*                    | 0.19*                        | 0.76*                    |
|                | <i>SD</i>       | 0.44                              | 0.51                     | 0.31                         | 0.61                     |
|                | <i>Skew</i>     | 1.63                              | 1.74                     | 1.63                         | 0.82                     |
|                | <i>Kurtosis</i> | 2.71                              | 3.58                     | 2.34                         | -0.51                    |
| Intrusion      | <i>M</i>        | 0.29                              | 0.28                     | 0.26                         | 0.51                     |
|                | <i>SD</i>       | 0.47                              | 0.57                     | 0.32                         | 0.66                     |
|                | <i>Skew</i>     | 2.24                              | 2.49                     | 2.37                         | 0.79                     |

## ETV ACROSS CONTEXTS AND TRAUMA SYMPTOMS

---

|                 |      |      |      |       |
|-----------------|------|------|------|-------|
| <i>Kurtosis</i> | 5.62 | 7.13 | 5.85 | -0.52 |
|-----------------|------|------|------|-------|

---

*Note.* \* indicates significant differences ( $p < .05$ ) with at least one other group (see text for description of differences). Means and standard deviations were estimated using the recommended procedures in Mplus to account for uncertainty in group membership. Skew and kurtosis were calculated according to assigned group, and therefore do not account for classification error.
